# Supplementary material
Source: PubMed Central journal article supplement (PMC8100568)
Supplement: ONCO-26-e838-s001.pdf [file ONCO-26-e838-s001.pdf]

Supplemental Tables for:  
Radiotherapy-PCV versus radiotherapy-temozolomide for IDH-mutant anaplastic astrocytoma: a retrospective multicentre analysis of the POLA cohort  
Vincent Esteyrie et al.

**Table S1.** Patient's clinical and demographic characteristics in the cohort of the three centers of Paris, Lyon and Toulouse

|                              | RT + temozolomide<br>N = 72 | RT + PCV<br>N = 67 | Total<br>N = 139 | p             |
|------------------------------|-----------------------------|--------------------|------------------|---------------|
| Median age (range)           | 39 (20 ; 71)                | 37 (19 ; 67)       | 38 (19 ; 71)     | <b>0.0139</b> |
| Sex                          |                             |                    |                  |               |
| Male                         | 44 (61.1%)                  | 35 (52.2%)         | 79 (56.8%)       | 0.2913        |
| Female                       | 28 (38.9%)                  | 32 (47.8%)         | 60 (43.2%)       |               |
| Performance Status           |                             |                    |                  |               |
| 0                            | 45 (63.4%)                  | 44 (68.8%)         | 89 (65.9%)       | 0.3763        |
| 1                            | 18 (25.4%)                  | 17 (26.6%)         | 35 (25.9%)       |               |
| 2                            | 8 (11.3%)                   | 3 (4.7%)           | 11 (8.1%)        |               |
| Missing                      | 1                           | 3                  | 4                |               |
| Initial surgery              |                             |                    |                  |               |
| Biopsy                       | 13 (18.1%)                  | 10 (14.9%)         | 23 (16.5%)       | 0.6197        |
| Resection                    | 59 (81.9%)                  | 57 (85.1%)         | 116 (83.5%)      |               |
| Localisation                 |                             |                    |                  |               |
| Frontal                      | 56 (77.8%)                  | 46 (68.7%)         | 102 (73.4%)      | 0.2241        |
| Temporal                     | 22 (30.6%)                  | 33 (49.3%)         | 55 (39.4%)       | 0.0243        |
| Parietal                     | 11 (15.3%)                  | 8 (11.9%)          | 19 (13.7%)       | 0.5671        |
| Occipital                    | 7 (9.7%)                    | 3 (4.5%)           | 10 (7.2%)        | 0.3288        |
| Side                         |                             |                    |                  |               |
| Right                        | 36 (50.0%)                  | 29 (43.3%)         | 65 (46.8%)       | 0.7154        |
| Left                         | 33 (45.8%)                  | 34 (50.7%)         | 67 (48.2%)       |               |
| Median                       | 3 (4.2%)                    | 4 (6.0%)           | 7 (5.0%)         |               |
| IDH mutation type            |                             |                    |                  |               |
| IDH 1                        | 72 (100%)                   | 66 (98.5%)         | 138 (99.3%)      |               |
| IDH 2                        | 0 (0.0%)                    | 1 (1.5%)           | 1 (0.7%)         |               |
| Sub-ventricular zone contact |                             |                    |                  |               |
| Yes                          | 52 (83.9%)                  | 46 (75.4%)         | 98 (79.7%)       | 0.2437        |
| No                           | 10 (16.1%)                  | 15 (24.6%)         | 25 (20.3%)       |               |
| Missing                      | 10                          | 6                  | 16               |               |
| MIB1                         |                             |                    |                  |               |
| Median (range)               | 10 (1 – 80)                 | 10 (2 – 30)        | 10 (1 – 80)      | 0.8879        |
| ≤10%                         | 31 (58.5%)                  | 39 (65.0%)         | 70 (61.9%)       | 0.4769        |
| >10%                         | 22 (41.5%)                  | 21 (35.0%)         | 43 (38.1%)       |               |
| Missing                      | 19                          | 7                  | 26               |               |

Supplemental Tables for:  
Radiotherapy-PCV versus radiotherapy-temozolomide for IDH-mutant anaplastic astrocytoma: a retrospective multicentre analysis of the POLA cohort  
Vincent Esteyrie et al.

Table S2. Univariable analysis of progression-free survival in the national POLA cohort

|                              | Events   | 4 years Survival | HR   | CI 95%         | p                   |
|------------------------------|----------|------------------|------|----------------|---------------------|
| Treatment                    |          |                  |      |                | <b>p= 0.0074</b>    |
| RT + PCV                     | 32 / 122 | 70.82%           | 0.58 | [ 0.38 ; 0.87] |                     |
| RT + temozolomide            | 89 / 189 | 53.48%           | 1.00 |                |                     |
| Initial surgery              |          |                  |      |                | <b>p&lt; 0.0001</b> |
| Resection                    | 89 / 254 | 64.00%           | 0.45 | [ 0.30 ; 0.68] |                     |
| Biopsy                       | 32 / 55  | 37.52%           | 1.00 |                |                     |
| Performance Status           |          |                  |      |                | <b>p= 0.0015</b>    |
| 0 - 1                        | 79 / 232 | 65.87%           | 0.37 | [ 0.20 ; 0.70] |                     |
| ≥ 2                          | 11 / 18  | 34.74%           | 1.00 |                |                     |
| Sub-ventricular zone contact |          |                  |      |                | p= 0.8130           |
| Yes                          | 38 / 98  | 59.80%           | 1.00 |                |                     |
| No                           | 13 / 36  | 55.30%           | 0.93 | [ 0.49 ; 1.74] |                     |
| Localisation                 |          |                  |      |                |                     |
| Frontal                      | 82 / 213 | 61.92%           | 0.83 | [ 0.55; 1.26]  | p= 0.3814           |
| Parietal                     | 21 / 49  | 58.05%           | 1.12 | [ 0.70; 1.81]  | p= 0.6283           |
| Temporal                     | 46 / 111 | 52.90%           | 1.27 | [ 0.87; 1.86]  | p= 0.2110           |
| Occipital                    | 8 / 18   | 50.24%           | 1.17 | [ 0.57; 2.40]  | p= 0.6728           |
| Mib1                         |          |                  |      |                | <b>p= 0.0201</b>    |
| ≤10%                         | 46 / 146 | 69.72%           | 0.64 | [ 0.43; 0.93]  |                     |
| >10%                         | 60 / 136 | 52.56%           | 1.00 |                |                     |
| Age                          |          |                  | 1.01 | [1.00; 1.03]   | p= 0.0828           |

Supplemental Tables for:  
Radiotherapy-PCV versus radiotherapy-temozolomide for IDH-mutant anaplastic astrocytoma: a retrospective multicentre analysis of the POLA cohort  
Vincent Esteyrie et al.

**Table S3.** Univariable analysis of overall survival in the national POLA cohort

|                              | Events   | 4 years Survival | HR   | CI 95%         | p                 |
|------------------------------|----------|------------------|------|----------------|-------------------|
| Treatment                    |          |                  |      |                | p = 0.0675        |
| RT + PCV                     | 14 / 122 | 84.31%           | 0.57 | [ 0.30 ; 1.05] |                   |
| RT + temozolomide            | 51 / 189 | 76.63%           | 1.00 |                |                   |
| Initial surgery              |          |                  |      |                | <b>p = 0.0420</b> |
| Resection                    | 48 / 254 | 80.29%           | 0.57 | [ 0.32 ; 0.99] |                   |
| Biopsy                       | 17 / 55  | 73.94%           | 1.00 |                |                   |
| Performance Status           |          |                  |      |                | <b>p = 0.0004</b> |
| 0 -1                         | 38 / 232 | 83.73%           | 0.26 | [ 0.11 ; 0.58] |                   |
| ≥ 2                          | 7 / 18   | 53.48%           | 1.00 |                |                   |
| Sub-ventricular zone contact |          |                  |      |                | p = 0.4833        |
| Yes                          | 17 / 98  | 81.86%           | 1.00 | [ 0.58 ; 3.18] |                   |
| No                           | 8 / 36   | 82.25%           | 1.36 |                |                   |
| Localisation                 |          |                  |      |                |                   |
| Frontal                      | 48 / 213 | 77.40%           | 1.25 | [ 0.68; 2.32]  | p = 0.4733        |
| Parietal                     | 11 / 49  | 80.24%           | 0.85 | [ 0.43; 1.69]  | p = 0.6429        |
| Temporal                     | 21 / 111 | 81.63%           | 0.89 | [ 0.52; 1.51]  | p = 0.6629        |
| Occipital                    | 5 / 18   | 79.06%           | 1.26 | [ 0.50; 3.16]  | p = 0.6191        |
| Mib1                         |          |                  |      |                | <b>p = 0.0005</b> |
| ≤10%                         | 19 / 146 | 89.69%           | 0.39 | [ 0.22; 0.67]  |                   |
| >10%                         | 39 / 136 | 68.62%           | 1.00 |                |                   |
| Age                          |          |                  | 1.02 | [1.00; 1.04]   | p= 0.0534         |
